# Supplementary material for: Determinants of Childhood Vaccination Non-Adherence in Sunampe, Peru: A Cross- Sectional Study on Coverage, Parental Concerns, and Mortality
Source: Research Square preprint supplement (doi:10.21203/rs.3.rs-7266880/v1), 2025-08-20
Supplement: Supplementary file 1 [file be07ab0762e0119fd3f9f8b0.docx]

**Highlights:**

Unlike global trends where vaccine hesitancy is linked to misinformation (Klimova et al., 2022), Sunampe’s primary barrier was fear of reactions (99.2% of mothers) despite minimal severe adverse events (3.25%)—a disconnect also observed in Turkey (Yalçin et al., 2022).

While logistic regression models in vaccine hesitancy studies often identify socioeconomic factors as key predictors (Bangura et al., 2020), our analysis in Sunampe uniquely found that infrastructure limitations family objections to vaccination (Q22), early vaccination discontinuation (Q02–Q05), ease of access (Q09), and parental knowledge of immunization schedules (Q14, Q17) with AUCs 0.71 - 0.85. suggesting a complex health system barriers may outweigh individual-level factors in this underserved Peruvian community.

While Mexico reported 48.9% full vaccination coverage (Hernández-Ávila et al., 2020), Sunampe’s rates were even lower (23.94% to 69.39%), exacerbated by a single health facility serving 30,000 residents—a logistical challenge mirrored in Lao PDR (Xaydalasouk et al., 2021).

Similar to Nigeria’s polio outbreak due to suspension of vaccinations (Klimova et al., 2022), Sunampe’s polio resurgence risk reflects gaps in coverage having also 71% anemia prevalence, yet Peru’s context includes unique structural barriers like anemia (40% prevalence) as a cofactor (Dórea, 2018).

Contrary to Argentina’s measles-free status pre-outbreak (Malerba, 2020), Sunampe’s low SPR2 coverage (43.17% in 2020) suggests vulnerability, though no outbreaks occurred—a paradox also noted in parts of Italy (Stefanati et al., 2020).

Like China’s findings (Zhang et al., 2023), parental hesitancy in Sunampe correlated with low health literacy, but Peru’s added challenge was systemic: 91% faced 2–4 hour wait times, a barrier less documented in high-income settings (Ekhaguere et al., 2021).
